# Supplementary material
Source: Springer Nature journal article supplement (https://www.springermedizin.de/resource/supplementary/12943_2011_1058_MOESM6_ESM.pdf/9552120)

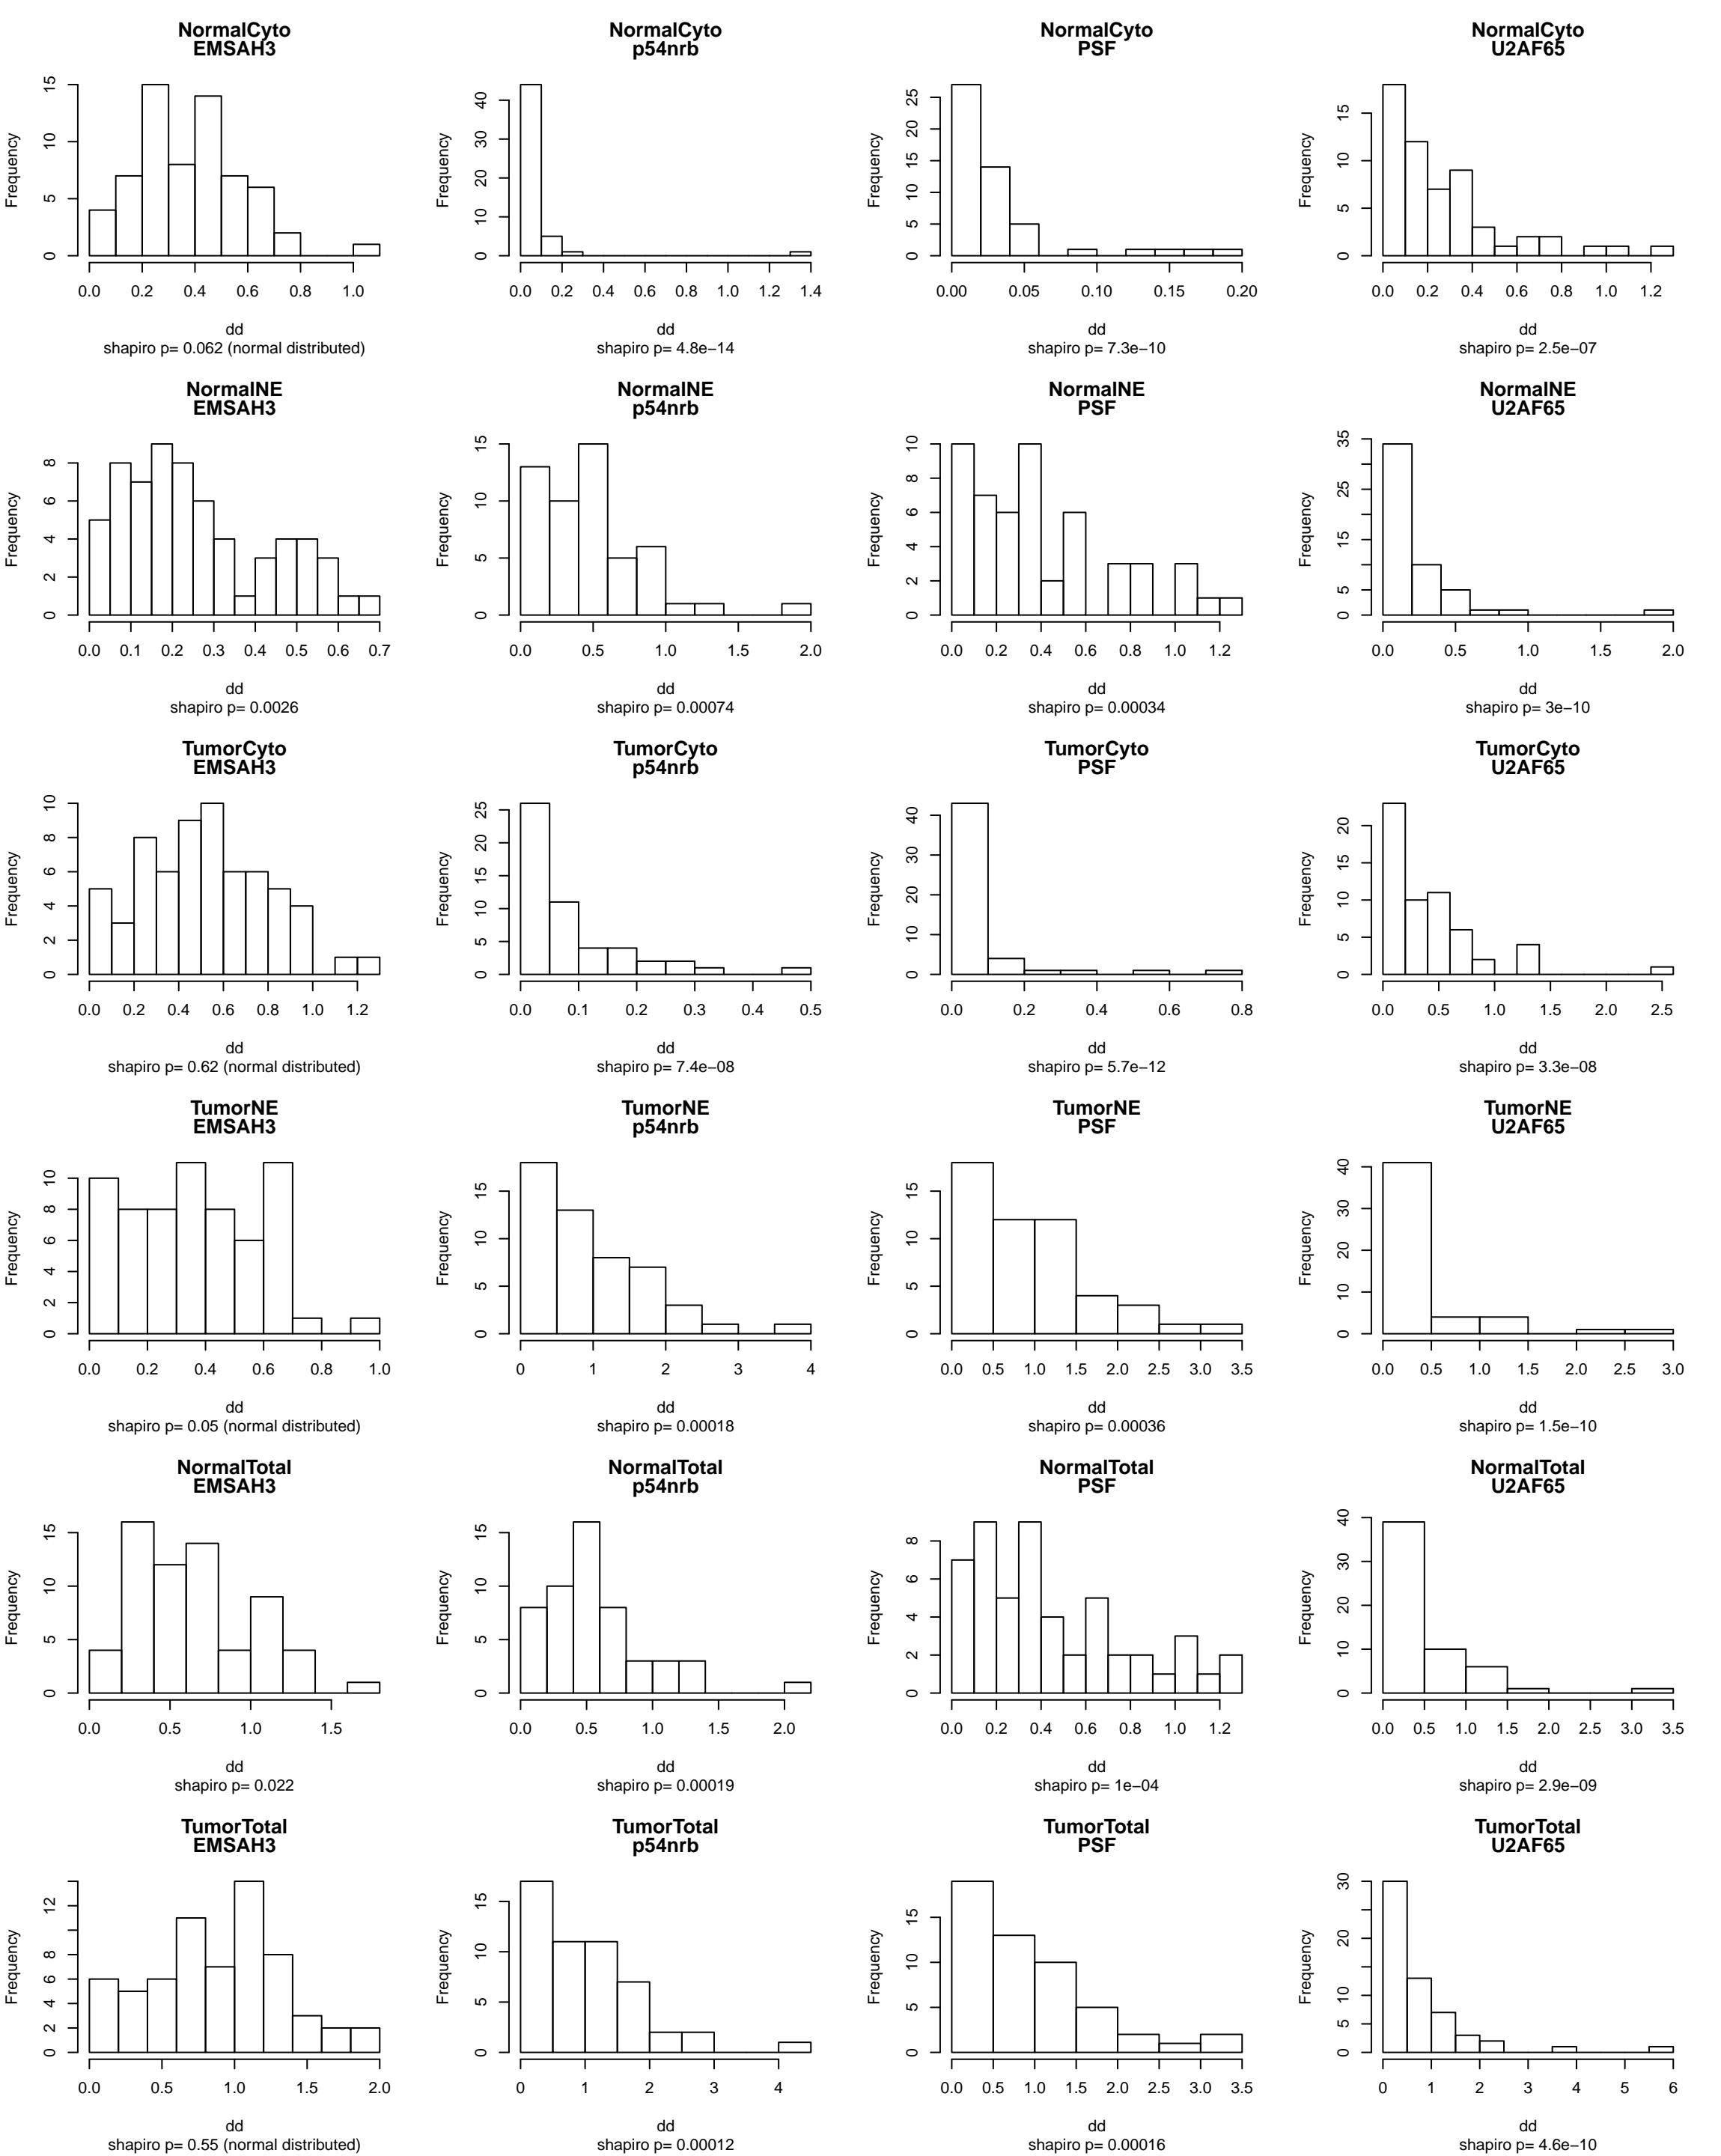

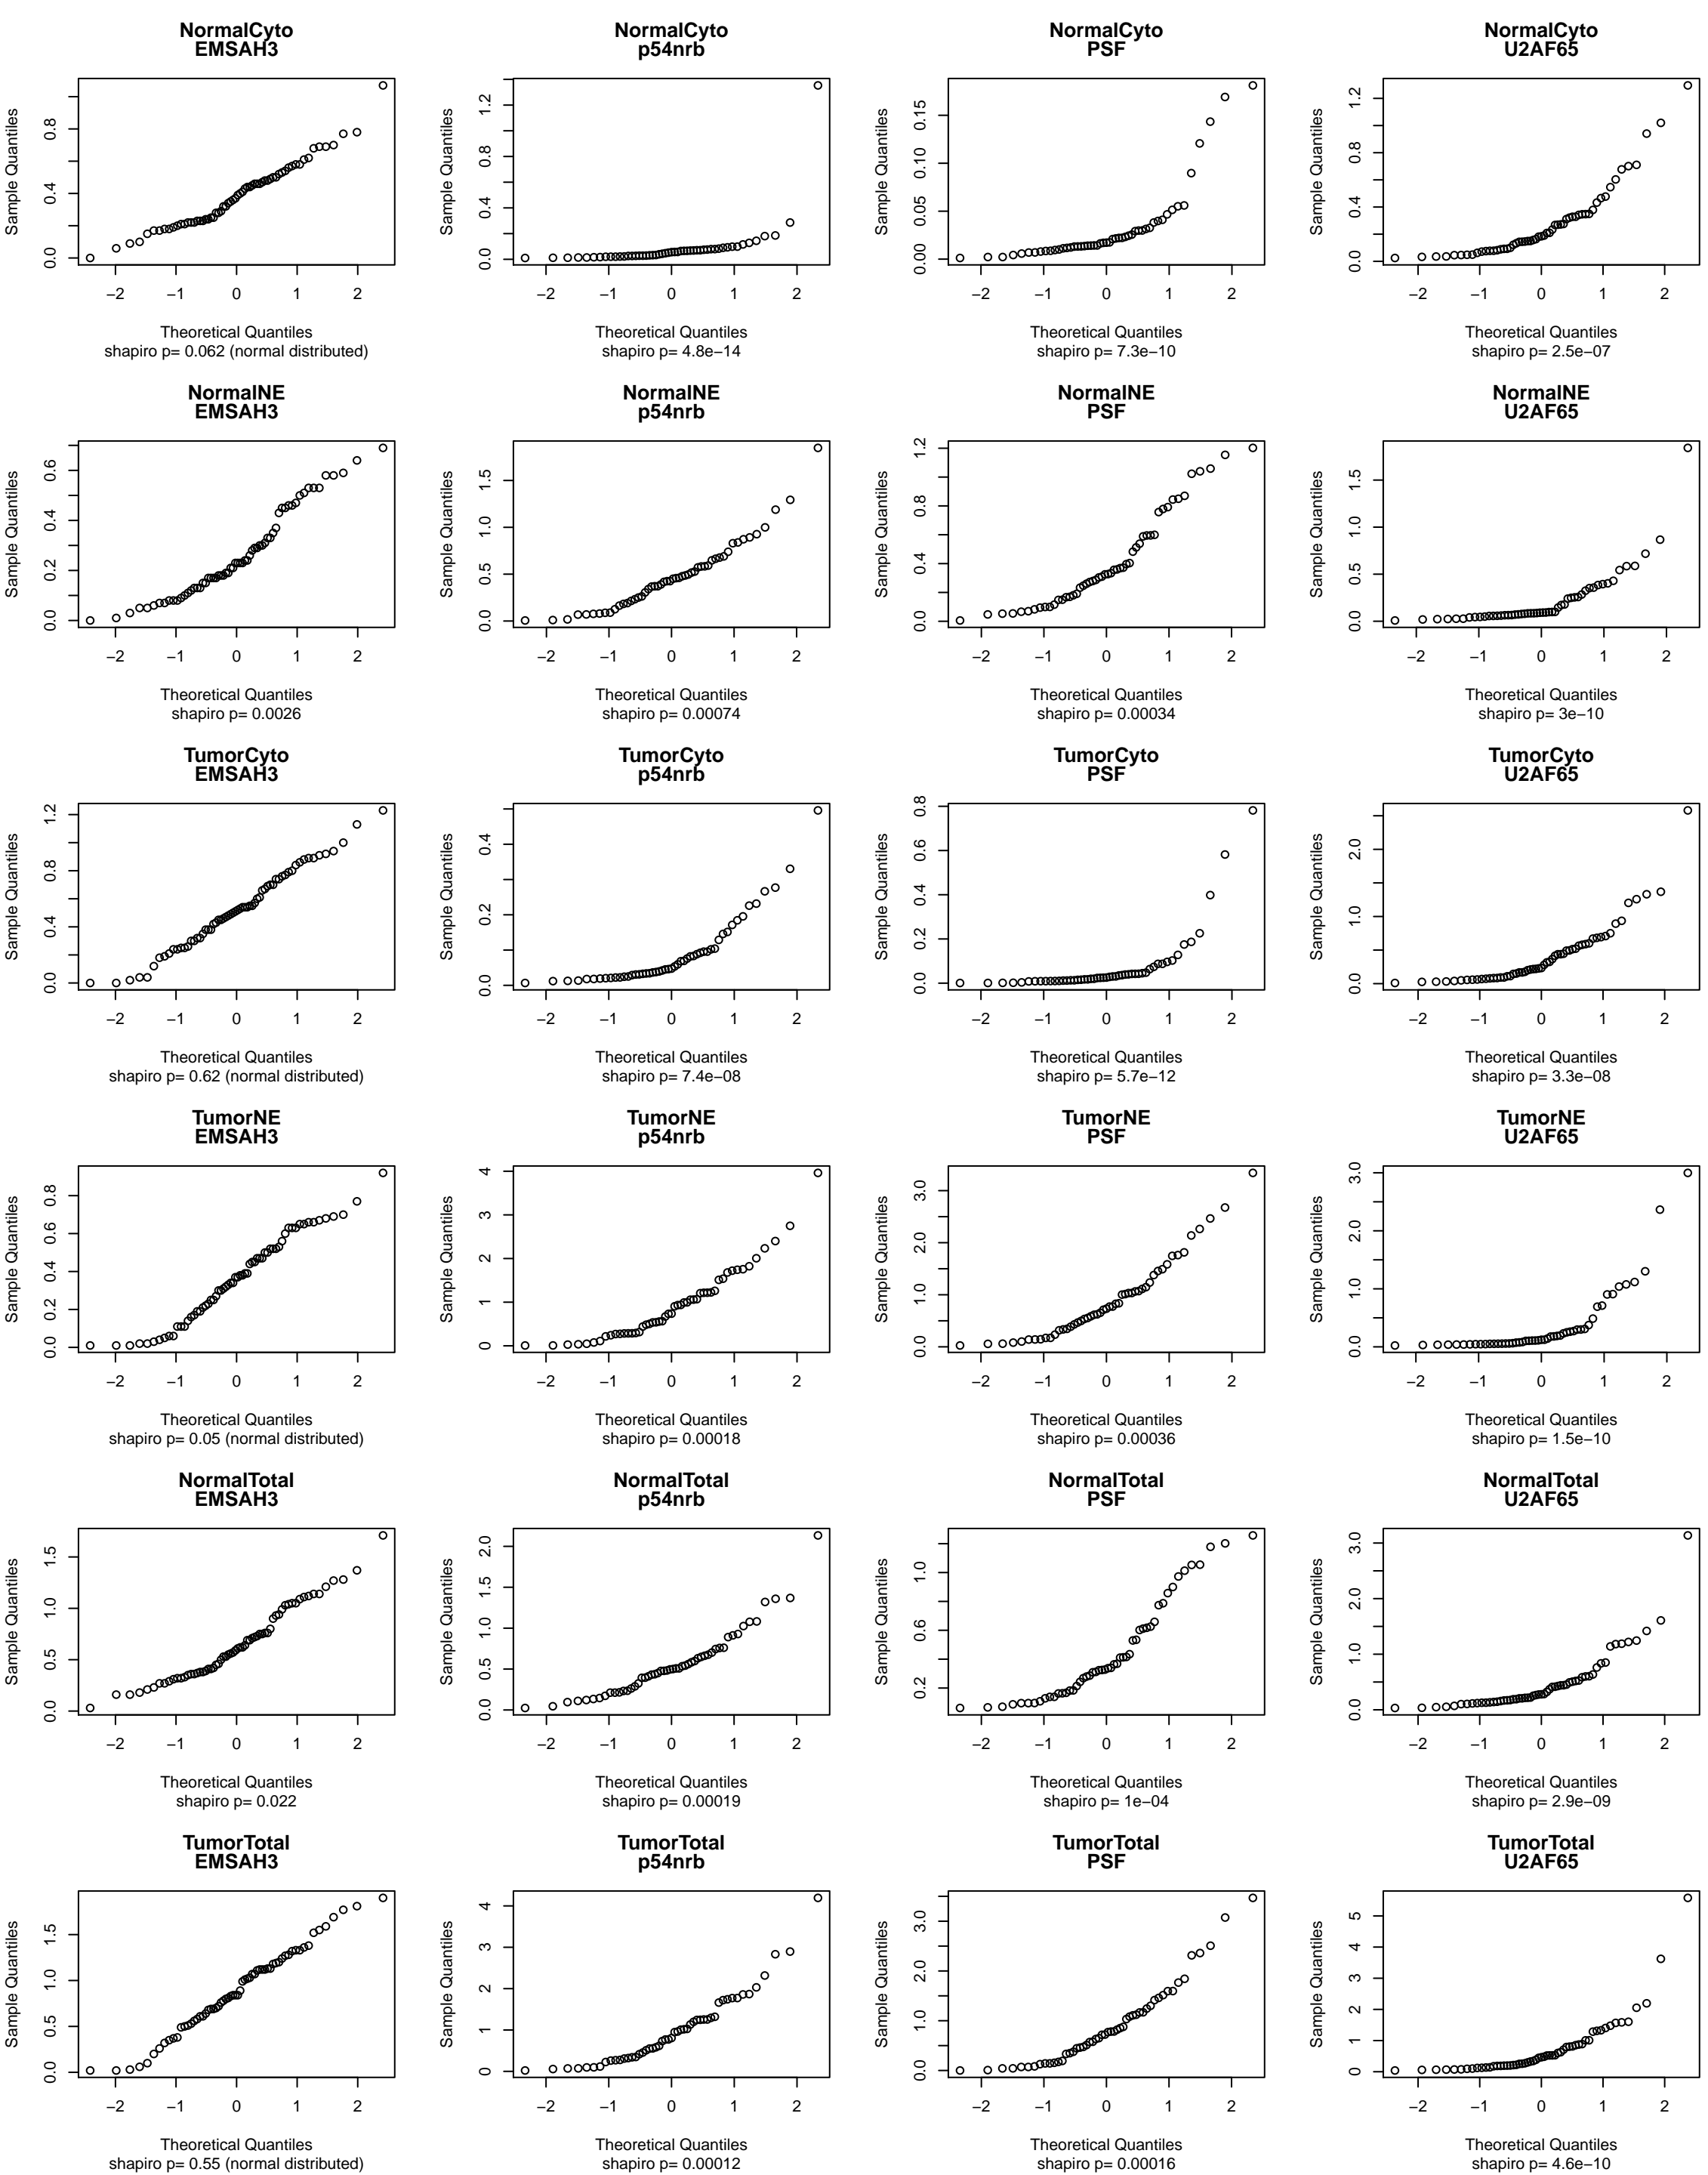

**NormalCyto**

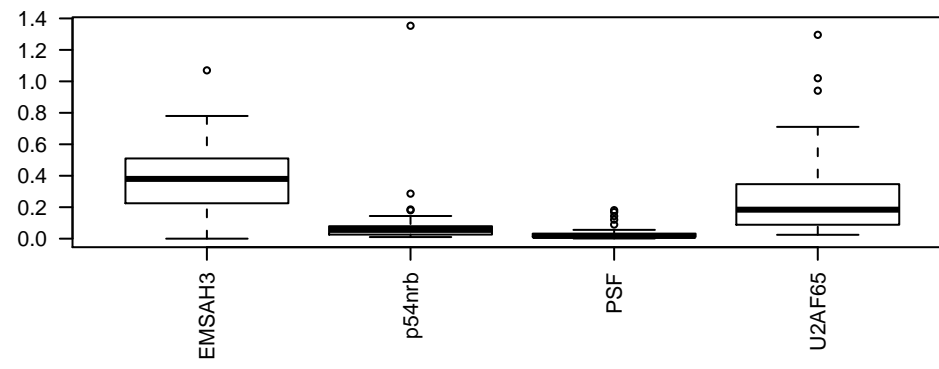

**NormalNE**

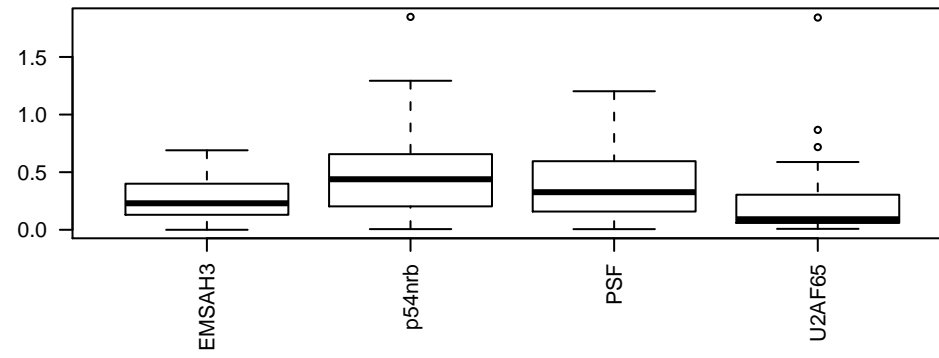

**TumorCyto**

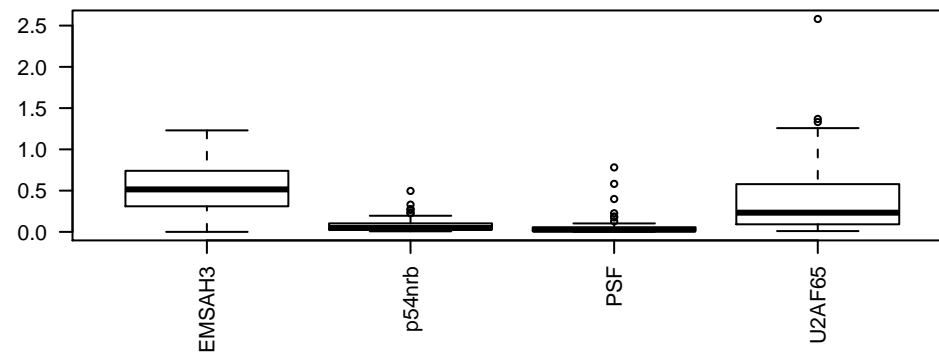

**TumorNE**

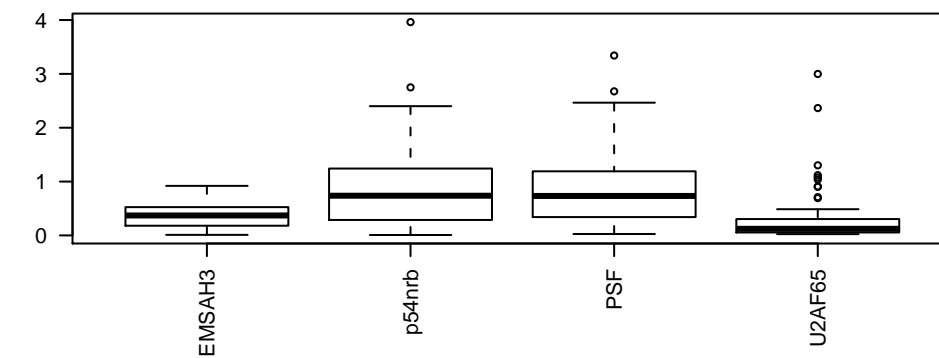

**NormalTotal**

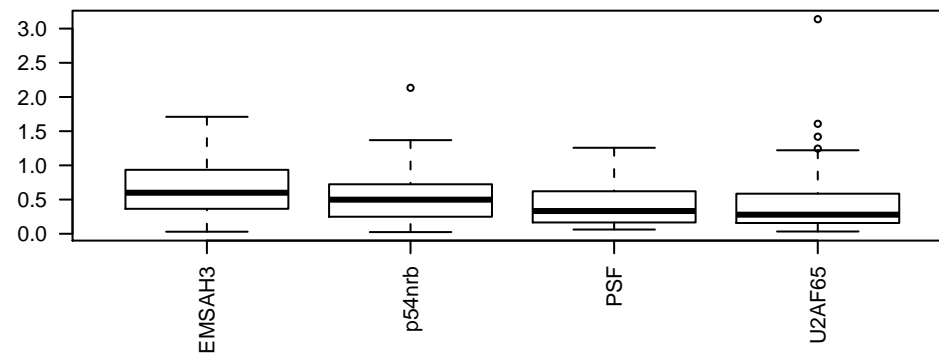

**TumorTotal**

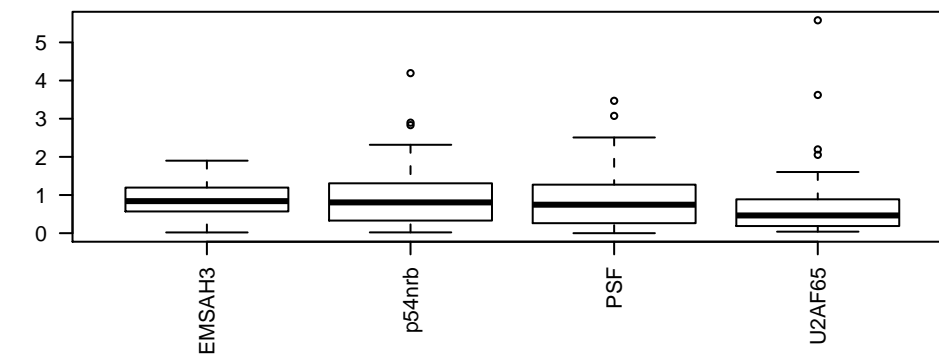

Supplement: MOESM6 [file 9552120]
